# Supplementary material
Source: PubMed Central journal article supplement (PMC6851471)
Supplement: NIHMS1532722-supplement-1.pdf [file NIHMS1532722-supplement-1.pdf]

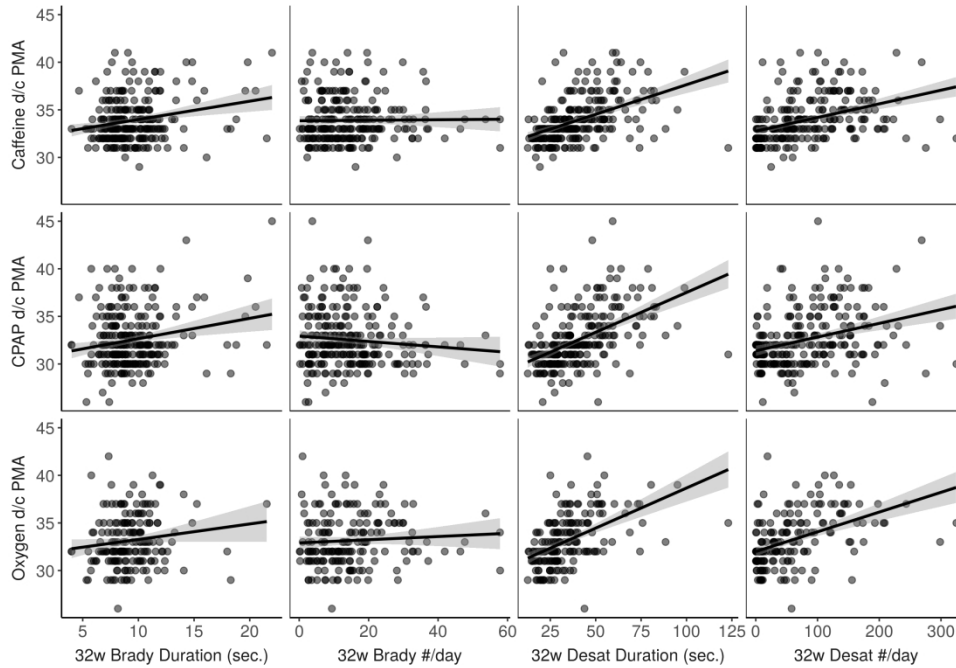

Supplemental Figure S1: Association between number and duration of events at 32w PMA and PMA at which therapies were discontinued. This scatter plot demonstrates the relationship between average number and duration of bradycardias and desaturations at 32w PMA and the PMA at which caffeine, CPAP, and supplemental oxygen were discontinued. The points correspond to individual infants in the study, with a solid line for the fitted linear model and grey shading indicating the 95% confidence interval around the trend.
